# Supplementary material for: Are dental professionals ready to deal with medical emergencies in their clinical office? A survey of university hospitals
Source: PubMed Central journal article supplement (PMC9514817; doi:10.25122/jml-2022-0012), 2022-08
Supplement: JMedLife-15-0979-s001.pdf [file JMedLife-15-0979-s001.pdf]

## Annex 1. Survey questionnaire.

1. Do you have an emergency kit?
2. How many emergency kits are there in the hospital?
3. What is the content of the emergency kit?
4. How many times periodical checking of the emergency kit is done?
5. How many times do you use the emergency kit yearly?
6. What is the most common drug used?
7. What is the least common drug in use?
8. How frequently do you replace the emergency kit?
9. Has an emergency case occurred in your clinic?
10. How many emergency cases occurred in your clinic?
11. How many times have you use the emergency kit?
12. Level of knowledge about the emergency kit and its contents?
13. Did you take any courses regarding emergency medicine?
